# Supplementary material
Source: HighWire-hosted journal article supplement (https://www.life-science-alliance.org/content/6/4/e202201615)
Supplement: inline-supplementary-material-2 [file inline-supplementary-material-2.pdf]

| Reference                               | Genes                                                                                                   |
|-----------------------------------------|---------------------------------------------------------------------------------------------------------|
| Mi, H., <i>et al.</i> (2021)            | <i>Actc1, Acta1, Acta2, Actg2, Adssl1, Adss, Edn1, Myh1, Myh2, Myh3, Myh6, Myh7, Myh7b, Myh8, Myh13</i> |
| Mognol, G.P., <i>et al.</i> (2016)      | <i>Bcl2, Fasl, Myc, Ccna2, Ccnd1, Ccnd3, Cdkn1a, Tnf, Tnfsf10, Ddias</i>                                |
| Herman-Kleiter, N. and Baier, G. (2010) | <i>Il2, Ifng, Il17a, Il17f, Il22, Il4, Il5, Il13, Il21</i>                                              |
| Vaeth, M., <i>et al.</i> (2014)         | <i>Cxcr5</i>                                                                                            |

**Supplementary table 1** List of NFAT target genes
